# Supplementary material for: Transcriptome analysis reveals key drought-stress-responsive genes in soybean
Source: Front Genet. 2022 Nov 28;13:1060529. doi: 10.3389/fgene.2022.1060529 (PMC9742610; doi:10.3389/fgene.2022.1060529)
Supplement: Supplementary file 2 [file DataSheet2.xlsx]

## Sheet: Table S1
Table S1 Basic soil fertility
Total Nitrogen g·kg-1	Total Potassium g·kg-1	Total Phosphorus g·kg-1	Available Nitrogen mg·kg-1		Available potassium mg·kg-1	Available phosphorus mg·kg-1	PH
1.18	21.68	0.55	67.3		98.2	8.52	6.42

## Sheet: Table S2
Table S2. The list of primers used for qRT-PCR
Gene ID	Forward primer (5'-3')	Reverse primer (5'-3')
GmUKN1(Glyma12g02310)	GCGAATGTTACGGAGGCTCTG	ATCTGAATGGTGGCGGGATCAA
Glyma.15G250100	CGTCCAGAAGCCTTACCT	CTGTTATTGCGAAATCGTG
Glyma.08G176300	ACCACCAGCCCAGCAAGA	GCCAGCGATTTGGACACG
Glyma.03G222600	CGGTGCTTCCGTAGTCAT	TCACAGTGGCGGTAATCC
Glyma.07G266200	CATAAGTTCATTGGGGAGG	AATTGTAAGACCGATGGAGA
Glyma.15G251500	TTGGACATCAAAGGGAGAA	CAACAAACTTGGGGCACT
Glyma.19G105100	GATTACCCTGACTACTACTTCCG	CACCTCCATCACCACTACG
Glyma.14G205200	CTTGGAAGCATAAAGAGCAG	TTTTCAACAATGTAAAGGACG
Glyma.02G048400	ATTCATTGTCTCCAGCCATC	CTTTGTCGCTGTATTCCTCA
Glyma.14G221200	GAAATGTTGGAGGTTTGTGC	CATAGCCTCGTTGATTCTGT

## Sheet: Table S3
Table S3. The transcriptome sequencing statistics of 18 libraries
Sample	Raw Datas	Clean data(%)	Q20(%)	Q30(%)
CK1-1	45805716	45691164 (99.75%)	6648384600 (98.24%)	6419015813 (94.85%)
CK1-2	41121412	41016646 (99.75%)	5941070145 (97.91%)	5705516298 (94.02%)
CK1-3	38833540	38734344 (99.74%)	5620820011 (98.08%)	5411177179 (94.43%)
CK2-1	44015966	43902236 (99.74%)	6388152648 (98.12%)	6156870746 (94.57%)
CK2-2	42788146	42677116 (99.74%)	6188957740 (97.75%)	5928507044 (93.64%)
CK2-3	44775808	44666278 (99.76%)	6468713601 (98.07%)	6225255846 (94.37%)
CK3-1	43125270	43021198 (99.76%)	6227358638 (97.97%)	5986287989 (94.17%)
CK3-2	44209462	44101016 (99.75%)	6373610311 (97.99%)	6125575751 (94.18%)
CK3-3	44760812	44640964 (99.73%)	6439675656 (98.11%)	6203843514 (94.52%)
LD-1	42773790	42675170 (99.77%)	6176054515 (97.97%)	5937658277 (94.19%)
LD-2	44726878	44614890 (99.75%)	6454299215 (97.86%)	6194258279 (93.92%)
LD-3	40965776	40863412 (99.75%)	5938356575 (98.09%)	5717263208 (94.43%)
MD-1	49516398	49399816 (99.76%)	7185668042 (98.19%)	6930420250 (94.70%)
MD-2	37217026	37125146 (99.75%)	5389159974 (97.95%)	5176316964 (94.08%)
MD-3	43611304	43508206 (99.76%)	6308939144 (98.11%)	6073173681 (94.44%)
SD-1	44597048	44494704 (99.77%)	6460521913 (98.19%)	6229782836 (94.68%)
SD-2	40955492	40857068 (99.76%)	5911749341 (97.98%)	5683795119 (94.21%)
SD-3	45241770	45138992 (99.77%)	6547336486 (98.18%)	6310317571 (94.63%)

## Sheet: Table S4
Table S4. A power analysis calculation of RNA-seq data
group	Depth	log2FC	FDR	CV	power(n=3)
CK1-vs-LD	10	2	0.05	0.00414674	0.765575
CK2-vs-MD	10	2	0.05	0.00734968	0.765424
CK3-vs-SD	10	2	0.05	0.00315144	0.765605

## Sheet: TableS5
id	Symbol	CK1-1	CK1-2	CK1-3	LD-1	LD-2	LD-3	CK2-1	CK2-2	CK2-3	MD-1	MD-2	MD-3	CK3-1	CK3-2	CK3-3	SD-1	SD-2	SD-3	CK1	CK2	CK3	LD	MD	SD	CK1-vs-LD-log2fc	CK1-vs-LD-pvalue	CK1-vs-LD-fdr	CK2-vs-MD-log2fc	CK2-vs-MD-pvalue	CK2-vs-MD-fdr	CK3-vs-SD-log2fc	CK3-vs-SD-pvalue	CK3-vs-SD-fdr
Glyma.01G011600	DAGLB	0.47	0.31	0.36	0.09	0.11	0.09	1.91	3.56	2.55	0.48	0.51	0.23	1.85	2.02	1.63	0.26	0.51	0.61	0.38	2.6733	1.8333	0.0967	0.4067	0.46	-1.97491	0.00654835	0.0349695	-2.71672	9.15e-14	2.5e-12	-1.99476	6.46e-07	5.99e-06
Glyma.01G031800	POT6	0.47	0.38	0.61	1.13	1.11	1.28	0.92	0.84	1.17	0.35	0.38	0.22	3.82	2.52	3.14	0.72	0.99	0.72	0.4867	0.9767	3.16	1.1733	0.3167	0.81	1.26961	0.00046752	0.0036768	-1.6249	2.38e-05	0.000217766	-1.96393	1.23e-10	1.82e-09
Glyma.01G060300	AFP2	2.17	2.57	2.52	9.34	9.41	8.27	1.48	1.59	1.33	3.51	3.45	3.14	3.45	3.9	3.71	8.93	9.27	8.97	2.42	1.4667	3.6867	9.0067	3.3667	9.0567	1.89599	7.87e-32	1.1e-29	1.19878	5.5e-08	7.86e-07	1.29666	9.67e-24	3.34e-22
Glyma.01G070400	--	0.06	0.15	0.15	0.35	0.44	0.45	0.3	0.15	0.3	0.48	0.51	0.55	0.24	0.35	0.31	0.15	0.02	0.06	0.12	0.25	0.3	0.4133	0.5133	0.0767	1.78427	0.000441589	0.00349971	1.03797	0.0094133	0.0430753	-1.96829	0.00463296	0.0197481
Glyma.01G091800	PHO1-H1	0.19	0.1	0.08	0.87	0.89	0.47	0.14	0.28	0.25	2.18	3.09	2.13	0.34	0.6	0.26	3.49	3.23	2.6	0.1233	0.2233	0.4	0.7433	2.4667	3.1067	2.59145	3.6e-07	5.75e-06	3.46529	3.91e-26	2.39e-24	2.9573	1.35e-28	5.74e-27
Glyma.01G124500	PFE	7.54	8.85	7.89	83.52	110.57	102.86	11.85	12.65	11.78	179.57	184.55	187.24	24.36	18.03	22.13	80.1	75.77	77.5	8.0933	12.0933	21.5067	98.9833	183.787	77.79	3.61238	3.78e-197	2.71e-193	3.92575	0	0	1.8548	3.82e-107	7.89e-105
Glyma.01G135500	SPX3	0.42	0.31	0.37	1.37	0.57	0.91	0.07	0.15	0.14	6.08	6.72	6.28	1.37	0.52	0.71	80.45	76.82	81.31	0.3667	0.12	0.8667	0.95	6.36	79.5267	1.37346	0.00853671	0.0433204	5.72792	4.69e-31	3.59e-29	6.51982	6.83e-266	5.31e-263
Glyma.01G162500	--	7.2	6.58	7.2	3.16	3.13	3.71	8.56	9.32	8.45	2.14	3.16	1.6	10.97	11.27	10.94	3.47	3.24	2.53	6.9933	8.7767	11.06	3.3333	2.3	3.08	-1.06901	1.12e-07	1.97e-06	-1.93204	1.81e-15	5.68e-14	-1.84435	4.69e-17	1.12e-15
Glyma.01G230200	At5g17165	36.54	29.38	30.02	88.34	75.67	84.49	32.47	33.08	35.48	146.4	147.78	140.62	99.9	88.16	100.7	325.43	315.27	330.74	31.98	33.6767	96.2533	82.8333	144.933	323.813	1.37304	1.99e-44	4.84e-42	2.10557	3.76e-153	2.94e-150	1.75025	1.31e-238	9.18e-236
Glyma.02G023900	N	3.44	2.86	3.34	1.44	1.61	0.92	3.97	6.97	5.24	1.8	1.99	2.23	5.33	5.23	5.33	1.39	1.24	1.71	3.2133	5.3933	5.2967	1.3233	2.0067	1.4467	-1.27989	2.42e-05	0.000262562	-1.42638	3.68e-07	4.67e-06	-1.87235	6.25e-10	8.58e-09
Glyma.02G081100	gpsn2	1.39	0.67	0.84	2.5	1.82	2.48	3.47	4.91	3.49	1.29	1.31	1.6	0.41	1.65	0.86	0.22	0.18	0.16	0.9667	3.9567	0.9733	2.2667	1.4	0.1867	1.22948	0.00216705	0.0138124	-1.49886	1.83e-06	2.08e-05	-2.38247	0.0027903	0.012679
Glyma.02G130200	PHO1-H1	0.73	0.6	0.6	2.32	1.43	2.02	0.48	0.41	0.61	4.86	6.67	5.22	0.82	0.74	1.01	3.88	3.89	3.39	0.6433	0.5	0.8567	1.9233	5.5833	3.72	1.57997	1.63e-08	3.27e-07	3.48113	1.81e-51	2.81e-49	2.1185	3.43e-26	1.33e-24
Glyma.02G182900	CPK32	0	0.03	0	0.23	0.27	0.03	0.13	0.06	0.19	0	0	0	0.03	0	0	0.17	0.21	0.17	0.01	0.1267	0.01	0.1767	0	0.1833	4.14296	0.00866288	0.0437852	-6.98489	0.0063824	0.0311753	4.1964	0.00525881	0.0220507
Glyma.02G219700	MES17	5.49	4.15	3.38	0	0.05	0	5.95	7.39	6.75	0.23	0	0.1	1.07	0.86	1.07	0.21	0.12	0.21	4.34	6.6967	1	0.0167	0.11	0.18	-8.02459	7.49e-11	2.08e-09	-5.92787	2.49e-22	1.24e-20	-2.47393	0.000788541	0.00415013
Glyma.02G240000	PAO5	0.12	0.18	0.11	0.7	0.71	0.69	0	0.03	0.08	0.48	0.46	0.78	0.79	0.64	0.73	2.17	1.67	2.36	0.1367	0.0367	0.72	0.7	0.5733	2.0667	2.35669	3.67e-05	0.000383159	3.96683	1.13e-05	0.000110349	1.52124	4.8e-08	5.24e-07
Glyma.02G261800	CLSY2	2.58	2.12	2.29	0.81	1.01	0.76	7.13	6.37	6.4	3.01	2.47	2.6	0.98	1.06	1.17	0.33	0.25	0.16	2.33	6.6333	1.07	0.86	2.6933	0.2467	-1.43792	6.96e-15	2.94e-13	-1.30034	1.75e-21	8.29e-20	-2.11698	2.22e-09	2.86e-08
Glyma.02G262500	PFE2	1.73	2.47	2.92	17.93	19.61	17.81	2.47	3.25	3.4	6	6.4	6.03	7.16	6.15	6.88	17.24	17.26	16.97	2.3733	3.04	6.73	18.45	6.1433	17.1567	2.95863	1.02e-55	3.54e-53	1.01495	3.35e-06	3.63e-05	1.35009	4.85e-25	1.77e-23
Glyma.02G282100	PIF4	2.94	2.31	2.55	6.46	5.17	5.17	5.37	7.48	6.07	2.97	2.89	2.74	3.05	3.59	3.65	1.28	0.83	0.98	2.6	6.3067	3.43	5.6	2.8667	1.03	1.10692	3.93e-10	9.9e-09	-1.1375	1.14e-10	2.26e-09	-1.73556	9.69e-11	1.45e-09
Glyma.03G032400	SPX3	0.04	0.05	0.21	1.1	0.49	0.3	0.09	0.05	0	3.22	4.35	3.67	0.2	0.25	0.25	34.84	34.46	35.86	0.1	0.0467	0.2333	0.63	3.7467	35.0533	2.65535	0.0027339	0.0168648	6.32707	3.93e-13	1.01e-11	7.23102	1.56e-76	2.02e-74
Glyma.03G048100	--	0.84	0.53	0.52	2.48	2.2	2.48	0.45	0.09	0	3.51	2.69	3.43	1.61	1.44	2.3	5.44	5.7	5.03	0.63	0.18	1.7833	2.3867	3.21	5.39	1.92157	1.92e-07	3.23e-06	4.1565	0.000166394	0.00126459	1.59571	1.2e-12	2.14e-11
Glyma.03G050100	PFE	34.9	33.81	37.17	274.52	377.38	348.24	21.93	22.3	23.94	383.55	435.03	412.44	40.97	25.72	34.51	89.66	93.17	88.11	35.2933	22.7233	33.7333	333.38	410.34	90.3133	3.2397	6.22e-95	6.08e-92	4.17457	0	0	1.42076	4.42e-16	1e-14
Glyma.03G078300	SQD2	9.76	8.11	10.01	30.04	30.28	29.98	1.33	1.27	1.21	264.98	235.3	252.77	1.92	1.14	1.92	246.42	243.76	244.19	9.2933	1.27	1.66	30.1	251.017	244.79	1.6955	5.8e-70	3.2e-67	7.62681	0	0	7.20422	0	0
Glyma.03G137900	RFS2	1.57	2.64	1.35	13.62	11.35	11.74	1.58	1.97	2.21	3.72	5.03	3.91	7.27	8.47	7.1	43.14	42.36	41.14	1.8533	1.92	7.6133	12.2367	4.22	42.2133	2.72302	5.85e-20	3.81e-18	1.13614	8.29e-10	1.48e-08	2.4711	4.54e-244	3.29e-241
Glyma.03G201000	NHL10	6.35	5.14	5.38	1.54	1.57	1.55	16.32	57.22	38.93	4.57	6.28	6.27	9.64	13.82	10.71	26.14	23.77	26.72	5.6233	37.49	11.39	1.5533	5.7067	25.5433	-1.85606	5.87e-16	2.72e-14	-2.71579	9.02e-08	1.25e-06	1.16518	8.68e-26	3.29e-24
Glyma.03G205900	AMP1	3.67	1.99	2.76	7.9	7.31	7.4	11.31	12.3	10.84	4.39	4.68	3.93	8.08	11.46	10.61	1.46	1.7	1.46	2.8067	11.4833	10.05	7.5367	4.3333	1.54	1.42507	5.55e-17	2.84e-15	-1.40599	6.73e-30	4.96e-28	-2.70619	5.01e-55	4.41e-53
Glyma.03G222600	SDR3b	8.09	10.93	9.47	19.35	24.88	24.81	2.65	1.93	2.28	4.69	7.35	4.67	7.84	5.86	7.5	16.27	20.29	21.45	9.4967	2.2867	7.0667	23.0133	5.57	19.3367	1.27698	2.03e-16	9.88e-15	1.28443	2.7e-06	2.97e-05	1.45224	1.06e-22	3.48e-21
Glyma.03G251400	PPCK2	7.03	8.48	7.59	20.49	19.77	21.75	5.31	8.3	6	20.46	21.61	20.96	3.87	5.42	5.18	42.39	38.88	39.18	7.7	6.5367	4.8233	20.67	21.01	40.15	1.42461	1.58e-24	1.43e-22	1.68445	4.75e-29	3.36e-27	3.0573	4.8e-129	1.28e-126
Glyma.04G014000	PLT5	0.75	1.06	1.1	23.27	19.65	23.58	0.05	0.11	0.05	0.66	0.92	0.98	0.15	8.15	4.77	0.25	0.36	0.38	0.97	0.07	4.3567	22.1667	0.8533	0.33	4.51426	1.88e-140	7.37e-137	3.60768	7.38e-08	1.04e-06	-3.72269	0.00419597	0.0181149
Glyma.04G042500	PK1	0.84	0.81	0.74	0.33	0.29	0.17	1.62	1.83	2.05	0.74	0.85	0.61	0.9	1.27	0.76	0.34	0.3	0.16	0.7967	1.8333	0.9767	0.2633	0.7333	0.2667	-1.59709	0.000105581	0.000992381	-1.32193	4.38e-06	4.63e-05	-1.87283	9.53e-05	0.000614255
Glyma.04G089000	DTX48	2.52	2.02	2.69	0.35	0.45	0.72	8.46	7.9	7.87	1.79	1.57	1.58	1.2	1.01	0.72	0.49	0.37	0.21	2.41	8.0767	0.9767	0.5067	1.6467	0.3567	-2.24992	2.67e-12	8.62e-11	-2.29421	3.48e-33	2.91e-31	-1.45329	0.00589321	0.0243477
Glyma.04G090800	--	6.95	3.21	5.85	12.25	10.25	10.45	2.02	1.9	1.53	12.84	11.51	14.81	0.41	0.82	1.04	5.03	3.71	4.03	5.3367	1.8167	0.7567	10.9833	13.0533	4.2567	1.04131	1.6e-05	0.000181993	2.84505	1.28e-29	9.38e-28	2.49199	4.13e-10	5.8e-09
Glyma.04G100300	PHI-1	2.09	2.22	2.02	0.27	0.39	0.52	3.79	19.88	11.69	1.71	2.98	2.72	3.04	3.44	2.88	10.39	9.48	9.37	2.11	11.7867	3.12	0.3933	2.47	9.7467	-2.42342	3.71e-09	8.14e-08	-2.25457	0.000793894	0.00508829	1.64336	1.71e-22	5.55e-21
Glyma.04G180800	--	1.64	0.81	0.82	2.98	2.93	2.65	0.66	1.21	1.06	5.43	4.95	4.95	6	4.92	5.29	20.66	20.75	20.38	1.09	0.9767	5.4033	2.8533	5.11	20.5967	1.38832	5.95e-05	0.000590924	2.38739	4.24e-17	1.49e-15	1.93049	8.32e-52	6.97e-50
Glyma.04G190900	BT2	1.48	1.38	1.56	0.72	0.68	0.57	10.17	12.7	11.32	2.52	1.97	2.91	12.75	11.59	10.8	2.56	2.86	2.59	1.4733	11.3967	11.7133	0.6567	2.4667	2.67	-1.16585	0.0016546	0.0109859	-2.20798	1.32e-30	9.92e-29	-2.13324	2.94e-29	1.28e-27
Glyma.04G222500	--	12	8.03	10.98	4.6	3.26	3.36	6.09	6.52	7.23	0.63	0.85	0.1	11.65	12.37	13.01	5.59	6.57	6.21	10.3367	6.6133	12.3433	3.74	0.5267	6.1233	-1.46666	8.4e-14	3.19e-12	-3.65042	2.06e-24	1.15e-22	-1.01134	3.33e-08	3.72e-07
Glyma.04G228400	PSRP1	12.21	9.44	9.96	23.44	25.75	25.42	22.87	20.06	23.05	4.64	4.52	5.5	7.19	8.18	7.75	2.42	2.28	2.06	10.5367	21.9933	7.7067	24.87	4.8867	2.2533	1.23899	2.88e-23	2.39e-21	-2.17014	2.26e-48	3.25e-46	-1.77405	1.79e-15	3.92e-14
Glyma.04G230400	--	5.15	4.23	4.31	0.91	2.81	1.51	9.82	13.22	11.42	5.3	4.81	4.28	5.19	5.5	6.68	2.46	1.94	2.72	4.5633	11.4867	5.79	1.7433	4.7967	2.3733	-1.38824	0.00011258	0.00105129	-1.25986	5.33e-08	7.63e-07	-1.28665	0.000272882	0.00159446
Glyma.05G011200	--	112.27	81.97	110.33	15.06	16.14	15.06	59.74	61.95	58.02	3.13	2.93	2.84	5.97	8.85	7.71	0.78	0.48	0.52	101.523	59.9033	7.51	15.42	2.9667	0.5933	-2.71894	1.18e-111	2.11e-108	-4.33572	2.02e-128	1.07e-125	-3.6619	1.54e-16	3.58e-15
Glyma.05G029000	WRKY72A	5.45	3.99	6.14	3.15	1.97	2.13	9.22	12.67	11	5.13	3.24	4.19	16.43	17.71	18.23	8.52	8.79	8.62	5.1933	10.9633	17.4567	2.4167	4.1867	8.6433	-1.10364	1.1e-08	2.25e-07	-1.38881	6.94e-16	2.25e-14	-1.01412	2.36e-18	6.18e-17
Glyma.05G029200	FIS1	4.08	2.99	3.93	12.21	13.49	13.72	0.61	0.57	0.53	3.51	3.74	4.74	5.4	4.07	5.8	13.88	12.39	11.86	3.6667	0.57	5.09	13.14	3.9967	12.71	1.84142	2.19e-31	2.98e-29	2.80976	2.1e-20	9.28e-19	1.32023	2.72e-22	8.74e-21
Glyma.05G063600	ERF1A	1.9	1.39	1.48	0.93	0.45	0.65	1	3.46	2.5	0.62	0.63	1.07	3.6	2.59	3.07	9.65	8.36	9.03	1.59	2.32	3.0867	0.6767	0.7733	9.0133	-1.23251	0.000453474	0.00358204	-1.58496	0.000134628	0.00104897	1.54601	6.2e-22	1.96e-20
Glyma.05G100900	ZFP7	0.93	0.8	1.39	2.53	2.27	2.62	0.47	0.83	0.37	1.59	1.96	1.24	0.89	1.55	0.76	2.5	2.03	1.95	1.04	0.5567	1.0667	2.4733	1.5967	2.16	1.24987	0.000786985	0.0057826	1.52018	0.00139369	0.00834335	1.01792	0.00361283	0.0158715
Glyma.05G208500	--	1.89	1.9	2.3	0.85	0.86	1.13	6.23	5.49	5.3	12.44	12.66	11.85	1.65	2.51	2.12	0.57	0.71	0.57	2.03	5.6733	2.0933	0.9467	12.3167	0.6167	-1.10055	2.9e-07	4.73e-06	1.11834	3.74e-24	2.06e-22	-1.76324	6.78e-10	9.28e-09
Glyma.05G210900	GSVIVT00026920001	1.23	1.45	1.71	0.29	0.54	0.43	1.08	1	1.09	0.21	0.26	0.2	0.11	1.75	0.77	0	0.03	0	1.4633	1.0567	0.8767	0.42	0.2233	0.01	-1.8008	1.22e-07	2.13e-06	-2.24225	3.12e-07	4e-06	-6.45396	0.000248226	0.0014634
Glyma.05G215700	--	2.36	2.04	3.05	9.12	8.48	10.63	1.5	3.65	2.04	5.31	5.27	6.74	1.79	1.89	1.34	6.88	5.5	5.68	2.4833	2.3967	1.6733	9.41	5.7733	6.02	1.92192	1.22e-13	4.52e-12	1.26838	4.37e-05	0.000379434	1.84704	4.19e-10	5.88e-09
Glyma.05G247900	PAP17	20.25	15.57	18.03	45.05	44.41	39.25	4.72	6.35	5.2	104.29	99.56	104.56	76.36	63.95	73.94	311.52	319.47	314.31	17.95	5.4233	71.4167	42.9033	102.803	315.1	1.25711	2.09e-37	3.82e-35	4.24456	0	0	2.14148	0	0
Glyma.06G004700	--	0.63	0.7	0.5	1.38	1.75	1.75	0.45	0.3	0.43	1	1.12	1.01	0.89	0.92	0.9	2.11	1.77	2.22	0.61	0.3933	0.9033	1.6267	1.0433	2.0333	1.41504	9.76e-06	0.00011721	1.40738	0.000245189	0.00178662	1.17052	1.87e-06	1.63e-05
Glyma.06G021200	Os01g0794400	28.93	34.87	30.15	231.72	208.9	225.44	9.8	10.75	12.42	50.63	56.11	55.72	43.5	47.95	44.43	137.5	130.5	135.13	31.3167	10.99	45.2933	222.02	54.1533	134.377	2.82569	0	0	2.30086	1.49e-129	8.32e-127	1.56891	1.01e-224	6.72e-222
Glyma.06G028200	PAP2	8.78	7.23	6.82	26.77	28.06	27.97	2.02	1.85	2.16	62	63.83	61.68	4.67	3.04	3.96	79.22	82.16	79.71	7.61	2.01	3.89	27.6	62.5033	80.3633	1.8587	5.53e-68	2.87e-65	4.95867	0	0	4.3687	0	0
Glyma.06G045400	ZAT10	3.08	2.83	2.53	9.53	3.65	6.64	13.62	57.65	34.7	4.38	6.79	6.15	12.02	12.64	11.94	32.59	31.09	32.27	2.8133	35.3233	12.2	6.6067	5.7733	31.9833	1.23164	0.00306801	0.0185563	-2.61315	6.18e-06	6.36e-05	1.39044	1.09e-82	1.65e-80
Glyma.06G079400	--	0	0	0	0.11	0.38	0.34	0	0	0.03	0.67	0.74	0.74	0	0	0	0.71	1.05	0.99	0	0.01	0	0.2767	0.7167	0.9167	8.11201	0.000331399	0.00271877	6.16323	6.09e-06	6.27e-05	9.84025	2.32e-08	2.64e-07
Glyma.06G079500	--	0.13	0.28	0.11	1.87	1.6	1.8	0	0.17	0.03	1.91	2.5	2.03	0.29	0.04	0.22	3.94	4.03	4.49	0.1733	0.0667	0.1833	1.7567	2.1467	4.1533	3.34122	1.83e-11	5.45e-10	5.00899	5.76e-14	1.6e-12	4.50173	2.49e-26	9.71e-25
Glyma.06G101200	OFUT7	0.53	0.19	0.28	1.07	0.93	1.25	0.48	1.28	0.84	0.33	0.36	0.34	0.57	1.55	0.94	0.35	0.19	0.11	0.3333	0.8667	1.02	1.0833	0.3433	0.2167	1.70044	3.81e-06	5.02e-05	-1.33587	0.00104899	0.00652185	-2.23502	1.43e-05	0.000107478
Glyma.06G136500	PSRP1	8.77	7.52	10.02	18.89	17.77	17.56	16.05	12.67	14.14	4.82	4.1	5.38	5.09	5.19	5.33	1.26	1.54	0.9	8.77	14.2867	5.2033	18.0733	4.7667	1.2333	1.04321	3.72e-15	1.61e-13	-1.58362	3.57e-21	1.65e-19	-2.07687	2.8e-14	5.64e-13
Glyma.06G137000	DMR6	79.42	79.38	80.49	12.23	13.2	13.21	14.68	15.87	15.18	7.43	7.37	6.91	6.26	8.92	6.86	3.38	3.46	3.88	79.7633	15.2433	7.3467	12.88	7.2367	3.5733	-2.63059	9.44e-280	2.03e-275	-1.07478	2.42e-19	1e-17	-1.03982	1.53e-07	1.55e-06
Glyma.06G142900	--	36.46	24.7	33.25	14.43	10.21	12.9	22.28	37.04	31.39	0.75	1.19	0.94	50.22	54.49	53.98	27.69	23.84	26.2	31.47	30.2367	52.8967	12.5133	0.96	25.91	-1.33051	7.04e-11	1.97e-09	-4.97712	1.33e-111	5.6e-109	-1.02967	5.98e-31	2.79e-29
Glyma.06G151300	wdr44	1.62	2.87	2.38	5.4	4.16	4.7	0.37	0.18	0.34	1.38	1.32	1.33	0.62	0.62	0.62	1.43	2.12	1.56	2.29	0.2967	0.62	4.7533	1.3433	1.7033	1.05359	4.85e-08	9.01e-07	2.1789	1.96e-11	4.24e-10	1.45802	9.22e-09	1.1e-07
Glyma.06G170700	KING1	0.55	0.31	0.63	1.64	1.2	1.55	3.28	3.31	3.11	0.71	0.94	0.65	2.81	2.74	2.25	0.78	0.82	0.66	0.4967	3.2333	2.6	1.4633	0.7667	0.7533	1.55891	7.39e-06	9.1e-05	-2.07635	1.47e-16	4.95e-15	-1.78715	7.01e-10	9.59e-09
Glyma.06G182700	BCA2	2.2	1.01	1.86	2.54	6.34	4.28	2.2	7.05	6	0.04	0.46	0.48	0.91	0.19	0.89	0.04	0.05	0.04	1.69	5.0833	0.6633	4.3867	0.3267	0.0433	1.3761	3.95e-05	0.000408873	-3.95988	1.31e-05	0.000125828	-3.93618	0.000597545	0.00323988
Glyma.06G259100	N	0.62	0.63	0.68	0.24	0.14	0.15	2.02	2.9	2.51	0.61	0.31	0.36	1.34	1.69	1.31	0.16	0.31	0.21	0.6433	2.4767	1.4467	0.1767	0.4267	0.2267	-1.86454	1.05e-05	0.000125531	-2.53722	1.63e-18	6.35e-17	-2.67409	2.62e-12	4.53e-11
Glyma.06G261100	At4g27290	0.56	0.49	0.47	0.31	0.16	0.14	1.94	3.71	2.8	0.26	0.27	0.29	4.08	4.24	4.18	0.98	0.7	1.1	0.5067	2.8167	4.1667	0.2033	0.2733	0.9267	-1.31719	0.00527889	0.029197	-3.36526	4.8e-23	2.49e-21	-2.16877	3.8e-21	1.15e-19
Glyma.06G265400	RUN1	0.44	0.66	0.7	0.28	0.15	0.26	3.76	5.99	4.08	1.75	1.63	1.78	13.98	11.27	11.64	2.8	2.81	2.68	0.6	4.61	12.2967	0.23	1.72	2.7633	-1.38333	0.00027097	0.0022837	-1.42236	1.02e-14	3.02e-13	-2.15379	3.61e-66	4.01e-64
Glyma.06G265800	--	0.17	0.28	0.24	0.71	0.92	0.68	0.38	0.75	0.46	0.14	0.25	0.13	0.35	0.23	0.17	0.04	0	0.05	0.23	0.53	0.25	0.77	0.1733	0.03	1.74322	0.000390269	0.00313862	-1.61244	0.00648755	0.0316386	-3.05889	0.00818822	0.0322339
Glyma.06G268100	ROQ1	0.48	0.39	0.63	0.06	0.11	0.06	3.01	5.39	4.21	0.39	0.46	0.34	2.23	1.9	1.97	0.71	0.53	0.37	0.5	4.2033	2.0333	0.0767	0.3967	0.5367	-2.70526	0.000157537	0.00141671	-3.40553	5.61e-26	3.39e-24	-1.92175	1.39e-07	1.42e-06
Glyma.06G269300	Os02g0190300	0.11	0.14	0.07	0.52	0.46	0.38	0.06	0.11	0.05	0.65	0.51	0.6	0.14	0.26	0.11	1.11	1.12	1.18	0.1067	0.0733	0.17	0.4533	0.5867	1.1367	2.08746	1.83e-05	0.000204562	3	1.28e-09	2.23e-08	2.7412	7.39e-16	1.65e-14
Glyma.06G304900	spg1	1.91	2.88	2.17	7.38	7.32	6.74	0.32	0.27	0.56	0.79	1.41	1.84	0.33	1.24	0.29	1.38	1.43	1.41	2.32	0.3833	0.62	7.1467	1.3467	1.4067	1.62315	3.53e-18	2.01e-16	1.81272	6.13e-05	0.000515107	1.18194	0.00074789	0.00395763
Glyma.06G310100	CXE15	15.38	13.94	15.12	7.06	7.03	7.81	13.05	28.11	21.13	6.24	9.46	8.64	12.39	13.07	12.14	5.84	5.42	5.03	14.8133	20.7633	12.5333	7.3	8.1133	5.43	-1.02093	3.85e-21	2.72e-19	-1.35567	7.7e-05	0.000630327	-1.20675	3.42e-17	8.23e-16
Glyma.06G312200	SPT6	1.42	1.14	1.48	0.34	0.48	0.31	1.18	0.9	0.83	0.36	0.37	0.46	1.6	1.62	1.62	0.62	0.77	0.54	1.3467	0.97	1.6133	0.3767	0.3967	0.6433	-1.83803	6.8e-14	2.61e-12	-1.29006	7.37e-06	7.45e-05	-1.32641	3.4e-08	3.8e-07
Glyma.07G048900	COMT1	24.37	21.48	24.69	10.86	10.87	10.86	64.01	83	75.19	10.63	16.47	14.43	41.33	45.63	46.44	19.79	23.01	21.99	23.5133	74.0667	44.4667	10.8633	13.8433	21.5967	-1.11401	5.49e-27	5.88e-25	-2.41963	2.08e-86	6.63e-84	-1.04192	2.71e-25	1e-23
Glyma.07G050300	ENDO2	2.02	1.87	1.81	5.95	4.43	5.67	1.77	1.04	0.54	9.47	7.05	7.79	31.52	14.61	24.3	11.83	8.92	9.27	1.9	1.1167	23.4767	5.35	8.1033	10.0067	1.49354	4.52e-10	1.12e-08	2.85932	1.78e-24	9.94e-23	-1.23027	0.00144376	0.00711244
Glyma.07G090400	--	0.83	1.1	0.95	4.18	3.44	3.52	0.08	0.6	0.34	0.96	1.3	0.79	0.22	0.35	0.22	1.14	0.45	0.64	0.96	0.34	0.2633	3.7133	1.0167	0.7433	1.95161	8.3e-15	3.49e-13	1.58024	0.00128733	0.00780926	1.49712	0.00290504	0.013132
Glyma.07G121500	CER1	7.35	9.11	7.52	40.46	35.38	35.31	3.58	1.71	3.07	22.18	23.31	23.42	9.91	7.2	9.12	23.07	20.33	24.96	7.9933	2.7867	8.7433	37.05	22.97	22.7867	2.2126	6.13e-102	7.14e-99	3.04314	6.55e-24	3.54e-22	1.38193	5.6e-39	3.37e-37
Glyma.07G121600	--	0.15	0.11	0.28	0.93	0.77	0.66	0.28	0.16	0.14	2.02	1.66	2.3	1.37	0.97	0.77	2.26	2.27	2.54	0.18	0.1933	1.0367	0.7867	1.9933	2.3567	2.12776	1.28e-07	2.22e-06	3.36602	1.22e-25	7.25e-24	1.1848	1.14e-09	1.52e-08
Glyma.07G126600	MIOX2	76.87	115.09	99.33	28.52	27.97	27.48	35.2	23.99	30.91	105.09	110.65	114.4	13.94	17.22	16	47.9	52.71	51.84	97.0967	30.0333	15.72	27.99	110.047	50.8167	-1.79451	1.03e-25	1.01e-23	1.87348	1.75e-61	3.56e-59	1.6927	3.45e-96	6.34e-94
Glyma.07G136000	At5g06060	6.46	8.43	6.54	24.81	26.71	23.68	1.05	0.46	0.75	11.4	8.53	8.99	0.2	0.65	0.54	1.87	2.01	1.54	7.1433	0.7533	0.4633	25.0667	9.64	1.8067	1.8111	1.58e-41	3.5e-39	3.67767	4.57e-39	4.77e-37	1.96321	5.61e-06	4.52e-05
Glyma.07G149700	--	2.29	1.59	1.76	5.53	4.32	4.71	1.3	0.8	0.93	5.67	3.93	5.37	1.36	1.55	1.21	3.78	2.61	3.82	1.88	1.01	1.3733	4.8533	4.99	3.4033	1.36824	1.23e-06	1.78e-05	2.30468	9.72e-13	2.41e-11	1.30927	1.35e-05	0.000101953
Glyma.07G155200	PFE	22.7	41.33	35.69	154.76	171.25	163.75	17.54	31.36	25.15	128.37	137.75	138.28	12.78	9.31	11.2	104.19	96.49	103.31	33.24	24.6833	11.0967	163.253	134.8	101.33	2.29612	1.32e-19	8.45e-18	2.44921	1.65e-32	1.34e-30	3.19086	1.41e-268	1.11e-265
Glyma.07G155500	PYL4	1.77	1.3	1.51	0	0.16	0	6.27	5.4	5.05	1.22	1.51	1.63	2.29	1.37	1.15	0.34	0.5	0.9	1.5267	5.5733	1.6033	0.0533	1.4533	0.58	-4.8392	4.69e-07	7.33e-06	-1.93917	1.5e-11	3.3e-10	-1.46695	0.0114906	0.043038
Glyma.07G203700	GLR2.7	2.16	1.87	2.17	0.97	0.92	0.95	1.35	1.37	1.25	2.6	4.06	3.32	32.65	35.83	33.62	6.83	6.76	6.72	2.0667	1.3233	34.0333	0.9467	3.3267	6.77	-1.12638	1.09e-08	2.25e-07	1.3299	6.94e-12	1.58e-10	-2.32972	3.3e-191	1.68e-188
Glyma.07G258100	--	0.38	0.25	0.54	1.33	1.48	1.2	2.78	4.07	3.19	1.45	1.21	0.95	9.63	9.76	11.33	2.41	4.41	2.32	0.39	3.3467	10.24	1.3367	1.2033	3.0467	1.77709	0.00619164	0.03335	-1.47569	0.000330312	0.00233096	-1.74891	8.41e-10	1.14e-08
Glyma.07G265000	--	1.39	2.26	2	5.08	4.32	4.68	0.75	1.49	0.67	6.17	6.04	7.3	21.15	21.64	20.53	4.05	3.69	3.44	1.8833	0.97	21.1067	4.6933	6.5033	3.7267	1.31732	3.74e-07	5.96e-06	2.74512	2.23e-22	1.11e-20	-2.50174	1.23e-57	1.16e-55
Glyma.07G266200	VTC4	1.95	1.04	1.4	3.24	3.51	2.82	0.4	0.31	0.44	3.9	5.07	4.54	0.54	0.38	0.53	4.75	3.94	3.99	1.4633	0.3833	0.4833	3.19	4.5033	4.2267	1.1243	9.58e-05	0.00090723	3.55432	7.31e-25	4.16e-23	3.12843	1.55e-22	5.05e-21
Glyma.08G021900	WRKY53	2.57	3.24	2.67	0.66	1.05	1.06	1.01	3.74	2.01	9.3	15.63	12.75	11.04	11.57	12.66	26.22	28.87	28.71	2.8267	2.2533	11.7567	0.9233	12.56	27.9333	-1.61418	6.2e-10	1.52e-08	2.4787	1.38e-06	1.59e-05	1.24851	2.43e-51	2.01e-49
Glyma.08G033800	PP2C06	5.78	6.41	6.81	19.87	16.1	18.8	1.69	1.66	1.32	3.2	3.3	2.88	3.1	3.9	3.29	11.59	12.68	13.39	6.3333	1.5567	3.43	18.2567	3.1267	12.5533	1.52739	9.06e-44	2.14e-41	1.00617	2.62e-07	3.41e-06	1.87179	1.69e-52	1.42e-50
Glyma.08G034400	--	14.83	16.19	15.31	64.6	54.11	68.39	6.77	8.15	7.77	21.25	19.67	20.55	24.35	23.15	23.81	56.67	48.22	56.2	15.4433	7.5633	23.77	62.3667	20.49	53.6967	2.01379	8.96e-89	8.21e-86	1.43783	1.44e-31	1.12e-29	1.17569	1.62e-56	1.48e-54
Glyma.08G056600	--	5.59	7.57	6.47	14.82	12.72	11.99	2.56	3.9	2.92	1.42	1.5	1.57	1.37	0.94	0.92	3.27	2.92	3.57	6.5433	3.1267	1.0767	13.1767	1.4967	3.2533	1.00989	1.47e-11	4.4e-10	-1.06287	0.000108031	0.000857758	1.59535	1.3e-09	1.72e-08
Glyma.08G060300	--	8.71	7.19	6.96	3.34	3.08	3.4	18.73	20.91	20.74	3.23	2.6	2.59	4.56	4.09	3.96	1.81	1.3	1.73	7.62	20.1267	4.2033	3.2733	2.8067	1.6133	-1.21903	3.53e-17	1.83e-15	-2.84218	5.42e-98	2.1e-95	-1.38149	3.24e-09	4.1e-08
Glyma.08G072000	TOM1	0.8	1.08	0.84	1.93	1.84	1.91	1.05	0.95	0.65	4.2	4.04	4.44	1.7	2.24	1.95	9.23	9.27	8.59	0.9067	0.8833	1.9633	1.8933	4.2267	9.03	1.06228	0.00323012	0.0194087	2.25849	1.42e-13	3.83e-12	2.20142	4.73e-28	1.97e-26
Glyma.08G093600	PAP8	3.54	2.44	3.66	8.68	7.74	9.15	1.38	1.14	1.35	19.99	17.15	18.77	10.05	5.85	7.48	105.43	105.9	106.76	3.2133	1.29	7.7933	8.5233	18.6367	106.03	1.40735	3.29e-16	1.57e-14	3.8527	1.17e-110	4.88e-108	3.76609	2.74e-65	2.98e-63
Glyma.08G108000	SBP1	1.49	1.39	1.75	0.23	0.18	0.14	3.84	3.93	4.21	1.32	1.84	1.71	1.3	1.85	1.78	0.56	0.72	0.41	1.5433	3.9933	1.6433	0.1833	1.6233	0.5633	-3.07351	2.42e-11	7.13e-10	-1.29863	1.68e-08	2.56e-07	-1.54456	0.000164181	0.00100637
Glyma.08G176300	NCED1	0.16	0.26	0.23	4.53	2.78	3.61	0.08	0.39	0.16	2.83	1.96	2.63	0.69	0.65	0.63	12.35	12.89	12.75	0.2167	0.21	0.6567	3.64	2.4733	12.6633	4.07039	2.31e-18	1.34e-16	3.558	6e-13	1.52e-11	4.26935	2.09e-63	2.2e-61
Glyma.08G178000	EXL2	3.08	2.27	3.81	1.07	1.37	1.16	3.71	9.48	6.36	2.1	2.84	1.94	4.45	4.47	4.42	2.34	1.67	1.3	3.0533	6.5167	4.4467	1.2	2.2933	1.77	-1.34735	2.81e-05	0.000301543	-1.50669	7.6e-07	9.17e-06	-1.32897	4.19e-05	0.000288763
Glyma.08G180600	ALD1	0.8	0.64	0.65	0.21	0.17	0.03	0.84	1.13	1.33	0.1	0.03	0	0.26	0.19	0.12	0.03	0	0	0.6967	1.1	0.19	0.1367	0.0433	0.01	-2.34981	5.97e-05	0.000593053	-4.66588	5.68e-09	9.17e-08	-4.24793	0.0092187	0.0357473
Glyma.08G181900	At3g43660	0.83	0.75	1.11	0.34	0.05	0.18	0.21	0.11	0.32	1.23	1.6	0.88	0.3	0.12	0.24	1.21	0.73	1.1	0.8967	0.2133	0.22	0.19	1.2367	1.0133	-2.23857	0.00117877	0.00820757	2.53528	9.15e-05	0.000738918	2.20353	0.000664035	0.00355795
Glyma.08G195000	At1g17710	6.35	4.62	5.2	10.24	11.9	10.35	0.43	0.17	0.56	51.94	51.18	51.99	2.46	2.08	2.55	84.39	90.05	83.05	5.39	0.3867	2.3633	10.83	51.7033	85.83	1.00668	1.67e-09	3.87e-08	7.06302	1.08e-137	6.6e-135	5.18259	0	0
Glyma.08G198900	IOS1	2.62	3.52	2.59	0.81	0.89	0.74	4	5.07	3.75	1.24	1.5	1.59	3.38	3.22	2.15	0.51	0.48	0.58	2.91	4.2733	2.9167	0.8133	1.4433	0.5233	-1.8391	4.09e-17	2.11e-15	-1.56596	4.07e-16	1.33e-14	-2.47852	2.28e-18	5.97e-17
Glyma.08G215300	BHLH25	5.36	4.57	5.34	12.36	12.24	12.15	2.81	2.71	2.58	6.42	6.4	7.69	0.32	0.23	0.54	0.67	0.92	1.08	5.09	2.7	0.3633	12.25	6.8367	0.89	1.26704	9.18e-17	4.59e-15	1.34033	1.61e-11	3.53e-10	1.29251	0.01048	0.0398497
Glyma.08G284000	NRT2.5	1.08	0.75	0.77	0.23	0.16	0.09	5.24	5.33	5.57	0.38	0.23	0.41	17.75	17.12	18.72	5.28	5.68	4.79	0.8667	5.38	17.8633	0.16	0.34	5.25	-2.43741	2.16e-06	2.99e-05	-3.984	9.15e-40	9.88e-38	-1.76661	9.7e-46	6.99e-44
Glyma.08G295800	ATHB-6	2.49	2.17	1.85	0.57	0.37	0.48	7.31	5.49	5.88	2.65	2.58	2.58	4.88	6.38	5.86	1.77	1.75	2.24	2.17	6.2267	5.7067	0.4733	2.6033	1.92	-2.19677	2.42e-10	6.29e-09	-1.2581	9.57e-10	1.69e-08	-1.57154	3.29e-11	5.17e-10
Glyma.08G321200	At5g10770	4.77	3.62	3.68	2.2	1.53	2.03	4.2	6.87	6.39	3.04	3.29	2.21	1.46	1.46	1.71	0.47	0.44	0.56	4.0233	5.82	1.5433	1.92	2.8467	0.49	-1.06728	5.3e-07	8.19e-06	-1.03175	3.91e-06	4.17e-05	-1.6552	0.000109333	0.000694069
Glyma.08G330700	CSLE1	0.26	0.19	0.23	0.05	0.06	0.05	2.28	3.39	2.57	0.08	0.15	0.13	1.08	0.56	0.77	0.19	0.3	0.25	0.2267	2.7467	0.8033	0.0533	0.12	0.2467	-2.08746	0.0100667	0.0495701	-4.51658	2.7e-25	1.57e-23	-1.70344	0.000985383	0.00505735
Glyma.08G355900	SDI1	0.79	0.68	0.57	3.44	2.6	2.92	0.09	0.19	0.22	3.62	3.71	3.21	6.82	5.73	7.67	0.97	0.66	1.24	0.68	0.1667	6.74	2.9867	3.5133	0.9567	2.13493	2.33e-09	5.29e-08	4.3978	1.4e-17	5.09e-16	-2.81666	6.01e-21	1.79e-19
Glyma.09G028100	At1g30700	13.45	21.08	17.86	7.81	8.76	8.11	4.11	2.35	3.47	10.67	8.69	9.93	1.38	1.27	1.14	2.39	2.55	3.07	17.4633	3.31	1.2633	8.2267	9.7633	2.67	-1.08595	5.22e-17	2.68e-15	1.56054	7.6e-19	3.03e-17	1.0796	3.64e-07	3.51e-06
Glyma.09G036400	CHLN	3.77	1.59	2.79	1.57	1.31	1.13	5.78	8.21	7.99	1.25	2.34	1.5	0.22	0.8	0.85	0.13	0.15	0.07	2.7167	7.3267	0.6233	1.3367	1.6967	0.1167	-1.0232	0.000322622	0.00265764	-2.11045	6.91e-21	3.14e-19	-2.41761	0.00224283	0.0104731
Glyma.09G047900	GALS3	6.16	9.22	7.53	18.64	15.69	16.76	1.24	1.4	0.92	7.35	7.25	6.83	0.87	1.08	1.32	2.34	3.21	2.29	7.6367	1.1867	1.09	17.03	7.1433	2.6133	1.15706	1.02e-16	5.08e-15	2.58968	2.06e-35	1.85e-33	1.26156	1.08e-06	9.69e-06
Glyma.09G049500	SCPL49	6.92	4.32	5.75	2.41	2.53	2.45	20	22.79	21.76	5.09	4.85	5.34	9.9	12.37	10.62	3.77	2.8	3.24	5.6633	21.5167	10.9633	2.4633	5.0933	3.27	-1.20104	4.08e-10	1.02e-08	-2.07877	5.34e-63	1.14e-60	-1.74532	1.89e-23	6.43e-22
Glyma.09G072000	ERF017	0.22	0.15	0.16	2.8	0.59	1.1	9.77	69.69	42.15	0.64	0.65	0.74	7.61	7.44	6.66	26.26	25.68	26.08	0.1767	40.5367	7.2367	1.4967	0.6767	26.0067	3.08265	5.14e-06	6.58e-05	-5.90464	2.78e-14	7.89e-13	1.84548	2.75e-60	2.71e-58
Glyma.09G073000	--	4.35	1.9	2.83	5.38	7.51	6.62	3.85	3.81	5.28	15.21	10.42	13.1	2.51	2.13	2.46	26.91	25.05	27.5	3.0267	4.3133	2.3667	6.5033	12.91	26.4867	1.10345	0.00234557	0.0147871	1.58161	2.19e-09	3.71e-08	3.48434	1.55e-45	1.1e-43
Glyma.09G127200	UGT1	4.28	4.63	5.12	1.19	0.7	0.77	3.57	4.24	3.98	0.85	1.6	0.78	0.36	0.32	0.39	0.1	0.04	0	4.6767	3.93	0.3567	0.8867	1.0767	0.0467	-2.39902	2.04e-22	1.57e-20	-1.86796	8.14e-12	1.84e-10	-2.93411	0.00602773	0.0248218
Glyma.09G147200	DREB1D	0.09	0.08	0.08	0.38	0.15	0.2	0.2	2.61	1.65	0.19	0.27	0.21	0.29	0.34	0.31	0.71	0.65	0.65	0.0833	1.4867	0.3133	0.2433	0.2233	0.67	1.54597	0.00902844	0.0453561	-2.73481	0.00384583	0.0202076	1.09646	6.14e-05	0.000409409
Glyma.09G151700	CRK8	14.03	11.33	11.85	5.17	5.59	5.32	24.55	28.08	25.08	7.05	7.04	7.43	56.13	56.63	53.34	22.1	21.97	22.09	12.4033	25.9033	55.3667	5.36	7.1733	22.0533	-1.21042	1.71e-30	2.24e-28	-1.85242	8.34e-87	2.69e-84	-1.32802	5.23e-95	9.43e-93
Glyma.09G161900	--	1.88	2.08	2.15	4.66	4.52	3.87	0.92	1.18	1.04	2.04	2.61	2.66	0.61	0.42	1.1	1.49	1.34	1.54	2.0367	1.0467	0.71	4.35	2.4367	1.4567	1.09481	9.95e-08	1.76e-06	1.21911	5.1e-06	5.33e-05	1.03678	0.00184971	0.00884517
Glyma.09G168300	BAM1	122.56	151.84	136.67	278.83	269.06	278.15	59.88	61.33	57.5	186.8	200.22	196.57	247.92	249.67	257	583.37	564.03	571.82	137.023	59.57	251.53	275.347	194.53	573.073	1.00683	4.35e-40	8.88e-38	1.70733	1.97e-160	1.63e-157	1.18799	6.34e-282	5.89e-279
Glyma.10G001700	CIPK7	48.7	46.37	45.44	147.82	138.82	158.53	14.64	16.81	16.7	39.41	37.98	37.27	63.05	55.25	61.91	126.78	137.43	144.41	46.8367	16.05	60.07	148.39	38.22	136.207	1.66368	2.73e-123	6.18e-120	1.25175	8.98e-44	1.1e-41	1.18108	1.71e-91	2.87e-89
Glyma.10G088000	AMP1	4.3	3.79	4.4	8.52	10.66	8.84	1.57	1.12	1.27	8.71	7.35	8.07	0.9	1.44	0.96	4.21	5.46	4.32	4.1633	1.32	1.1	9.34	8.0433	4.6633	1.16568	2.37e-16	1.15e-14	2.60726	5.16e-47	7.12e-45	2.08386	5.59e-24	1.95e-22
Glyma.10G142600	PIF3	3.43	4.35	3.71	11.9	9.21	9.95	1.38	1.44	1.27	6.81	7.1	6.25	2.46	2.51	1.92	6.19	6.4	6.23	3.83	1.3633	2.2967	10.3533	6.72	6.2733	1.43468	4.49e-26	4.51e-24	2.30132	5.92e-48	8.43e-46	1.44969	1.18e-26	4.65e-25
Glyma.10G145300	GOLS2	2.07	3.25	3.02	13.64	9.02	10.43	0.29	0.65	0.28	6.27	6.82	7.15	0.53	0.31	0.42	8.56	8.34	8.61	2.78	0.4067	0.42	11.03	6.7467	8.5033	1.98828	1.02e-23	8.66e-22	4.05226	2.02e-37	1.96e-35	4.33957	1.45e-48	1.11e-46
Glyma.10G151000	At1g56220	6.65	4.74	6.98	60	45.54	55.09	8.37	17.93	15.49	3.14	4.46	2.92	19.69	22.31	20.87	9.66	8.37	8.47	6.1233	13.93	20.9567	53.5433	3.5067	8.8333	3.12832	1.21e-102	1.48e-99	-1.99002	4.64e-15	1.41e-13	-1.24638	1.05e-14	2.19e-13
Glyma.10G205700	--	3.53	0.4	2.24	9.39	7.32	8.81	0.46	0.78	0.28	12.34	8.67	8.82	2.72	2.1	1.54	12.92	14.2	10.38	2.0567	0.5067	2.12	8.5067	9.9433	12.5	2.04829	0.00647954	0.0346655	4.29462	2.17e-22	1.08e-20	2.55979	3.95e-21	1.19e-19
Glyma.10G222400	PER12	2.62	1.22	2.03	4	4.4	5.4	11.04	21.09	16.1	1.48	1.87	1.59	3.69	2.31	4.21	1.83	1.52	1.16	1.9567	16.0767	3.4033	4.6	1.6467	1.5033	1.23324	4.41e-05	0.000450796	-3.28735	8.97e-40	9.7e-38	-1.17878	0.00224358	0.0104754
Glyma.11G004800	STP13	2.19	1.97	1.81	1.01	1	0.82	1.29	2.42	2.27	0.94	1.03	0.89	1.15	0.47	0.46	1.99	1.73	1.94	1.99	1.9933	0.6933	0.9433	0.9533	1.8867	-1.07693	0.00014296	0.00130166	-1.06413	0.00135154	0.00812534	1.44422	1.34e-05	0.000100977
Glyma.11G036400	ERF5	2.82	2.26	2.54	8.09	3.45	3.76	5.12	30.15	16.02	4.02	3.67	4.7	5.55	6.92	6.82	14.27	11.19	15.3	2.54	17.0967	6.43	5.1	4.13	13.5867	1.00567	0.00205377	0.0131869	-2.0495	0.00278335	0.0152654	1.0793	5.22e-12	8.79e-11
Glyma.11G046200	ACR1	0.76	0.48	0.49	2.34	1.72	2.22	0.33	0.32	0.68	0.94	1.13	0.82	2.39	2.8	3.49	6.8	6.37	6.79	0.5767	0.4433	2.8933	2.0933	0.9633	6.6533	1.85999	1.61e-09	3.73e-08	1.11964	0.00497726	0.025212	1.20134	1.95e-16	4.52e-15
Glyma.11G065000	GBF1	4.25	1.93	3.5	8.28	7.3	7.31	5.79	7.63	6.48	3.36	3.39	2.58	10.73	9.95	9.63	4.98	3.97	4.15	3.2267	6.6333	10.1033	7.63	3.11	4.3667	1.24164	1.05e-09	2.49e-08	-1.09282	2.16e-09	3.68e-08	-1.21023	1.27e-13	2.42e-12
Glyma.11G096600	NAC022	9.11	8.87	9.35	3.54	3.45	3.67	3.68	8.16	5.82	11.77	18.15	16.43	2.5	2.94	2.94	1.54	1.37	1.03	9.11	5.8867	2.7933	3.5533	15.45	1.3133	-1.35828	2.62e-21	1.87e-19	1.39208	2.96e-05	0.000266577	-1.08875	0.000425119	0.0023858
Glyma.11G123300	--	1.58	0.74	1	3.19	3.62	2.35	0.62	1.11	1	8.14	8.53	8.49	7.17	3.95	5.86	24.8	20.54	20.58	1.1067	0.91	5.66	3.0533	8.3867	21.9733	1.46416	0.000217153	0.00188124	3.20416	3.61e-26	2.22e-24	1.95688	1.37e-31	6.59e-30
Glyma.11G197300	CYP79D4	1.62	0.72	0.9	2.2	6.17	4.76	1.33	2.99	2.32	0.03	0.45	0.33	0.59	0.99	0.48	0.09	0.03	0.15	1.08	2.2133	0.6867	4.3767	0.27	0.09	2.0188	0.000367358	0.00297549	-3.03519	0.00056933	0.00378292	-2.93161	0.000122531	0.000770069
Glyma.11G211100	At5g49770	1.51	0.98	1.06	0.39	0.42	0.52	4.56	6.04	4.97	0.78	0.99	1.08	5.76	4.9	4.28	2.89	2.3	2.08	1.1833	5.19	4.98	0.4433	0.95	2.4233	-1.41639	2.22e-06	3.07e-05	-2.44974	3.84e-38	3.83e-36	-1.03915	3.98e-07	3.83e-06
Glyma.12G022700	NAC022	31.67	27.32	28.7	8.75	8.74	9.67	15.51	19.5	16.1	25.93	42.07	35.48	9.1	12.62	10.54	4.84	5.12	3.59	29.23	17.0367	10.7533	9.0533	34.4933	4.5167	-1.69093	2.68e-52	8.5e-50	1.01767	2.41e-13	6.34e-12	-1.25145	1.69e-09	2.2e-08
Glyma.12G041200	--	0.62	0.37	0.62	3.07	3.17	3.08	0.44	1.33	0.88	5.81	6.39	6.85	1.1	1.99	1.56	8.07	7.54	7.32	0.5367	0.8833	1.55	3.1067	6.35	7.6433	2.53327	6.7e-11	1.88e-09	2.84573	3.87e-21	1.78e-19	2.30193	1.59e-22	5.16e-21
Glyma.12G109900	--	6.47	6.39	6.74	15.33	14.67	14.73	4.55	6.83	4.99	2.66	3.1	2.04	0.46	0.93	1.17	0	0	0.3	6.5333	5.4567	0.8533	14.91	2.6	0.1	1.19039	1.75e-13	6.39e-12	-1.06951	0.000113169	0.000894586	-3.09311	0.0030883	0.0138505
Glyma.12G114200	--	0.08	0.12	0.23	1.1	0.86	0.94	0.36	0.04	0.08	0.8	0.69	0.75	0	0	0.09	0.42	0.39	0.33	0.1433	0.16	0.03	0.9667	0.7467	0.38	2.75364	2.05e-05	0.000226318	2.22239	0.00147891	0.00879572	3.66297	0.00321822	0.0143504
Glyma.12G119200	GRXC9	4.33	3.1	3.62	8.97	6.91	8.04	5.18	23.47	16.8	4.9	4.52	5.97	5.29	8.35	5.3	19.66	15.05	17.86	3.6833	15.15	6.3133	7.9733	5.13	17.5233	1.11417	2.17e-07	3.61e-06	-1.56229	0.00985739	0.0447641	1.4728	2.63e-20	7.6e-19
Glyma.12G129200	At2g42690	1.81	0.73	0.99	3.49	3.09	3.21	4.08	6.35	5.81	0.96	0.7	1.2	2.58	2.52	2.15	0.22	0.81	0.25	1.1767	5.4133	2.4167	3.2633	0.9533	0.4267	1.47164	4.85e-07	7.53e-06	-2.50546	1.33e-21	6.35e-20	-2.50184	1.92e-09	2.49e-08
Glyma.12G136900	--	0.66	0.46	0.39	3.35	3.19	2.83	2.24	2.77	2.47	0.79	0.51	0.7	1.01	0.58	0.75	0.24	0.05	0.22	0.5033	2.4933	0.78	3.1233	0.6667	0.17	2.6335	1.51e-12	5.04e-11	-1.90304	3.6e-07	4.58e-06	-2.19794	0.0050002	0.0210946
Glyma.12G178500	FIT	1.11	1.55	1	0.68	0.3	0.71	0.45	0.63	1.06	0.03	0.05	0.12	0.04	0.3	0.21	0	0	0	1.22	0.7133	0.1833	0.5633	0.0667	0	-1.11482	0.00712737	0.0374988	-3.41954	7.76e-05	0.000635145	-7.51833	0.0100464	0.0384438
Glyma.12G201000	--	6.03	3.4	5.23	18.1	14.55	14.75	7.71	12.08	12.25	3.93	4	4.84	46.96	39.19	40.99	17.47	17.63	20.19	4.8867	10.68	42.38	15.8	4.2567	18.43	1.693	4.3e-18	2.43e-16	-1.32712	3.43e-09	5.69e-08	-1.20133	7.93e-22	2.49e-20
Glyma.12G218900	Cdlc2	5.47	4.73	4.76	10.05	10.89	9.8	0.65	1.36	0.33	9.02	7.8	8.82	0.18	0	0.09	1.85	1.75	1.75	4.9867	0.78	0.09	10.2467	8.5467	1.7833	1.03901	3.25e-06	4.34e-05	3.45382	1.44e-20	6.43e-19	4.30851	6.95e-06	5.52e-05
Glyma.12G224300	--	0.42	0.17	0.32	1.47	1.46	2.09	1.56	2.15	1.69	0.31	0.71	0.28	4.97	4.54	4.22	1.02	0.8	0.93	0.3033	1.8	4.5767	1.6733	0.4333	0.9167	2.46375	3.2e-07	5.18e-06	-2.05445	2.89e-06	3.16e-05	-2.31983	1.59e-14	3.27e-13
Glyma.13G006700	NUDT2	3.23	4.16	3.85	0.54	0.47	0.6	1.43	2.37	1.64	3.04	7.33	3.59	2.28	2.38	2.75	0.56	0.8	0.84	3.7467	1.8133	2.47	0.5367	4.6533	0.7333	-2.80351	2.56e-18	1.48e-16	1.35962	7.65e-06	7.7e-05	-1.75197	3.78e-06	3.14e-05
Glyma.13G009100	XERICO	2.11	2.76	2.3	23.69	19.88	20.56	1.17	1.24	1.69	3.77	3.53	3.52	7.79	5.99	8.03	16.52	17.47	16.78	2.39	1.3667	7.27	21.3767	3.6067	16.9233	3.16095	1.25e-64	5.76e-62	1.4	6.05e-06	6.24e-05	1.21899	7.74e-19	2.08e-17
Glyma.13G117600	WRKY42	3.87	2.44	2.31	1.18	1.3	1.72	5.77	7.16	7.91	3.24	3.57	3.6	5.3	5.2	5.38	2.25	1.96	2.53	2.8733	6.9467	5.2933	1.4	3.47	2.2467	-1.0373	3.12e-05	0.000331136	-1.00139	1.01e-08	1.58e-07	-1.23639	7.17e-09	8.67e-08
Glyma.13G140200	--	0.09	0.29	0.41	1.19	2.18	1.77	0.49	0.79	0.76	0.08	0.05	0.14	2.21	1.11	1.62	3.31	2.88	4.03	0.2633	0.68	1.6467	1.7133	0.09	3.4067	2.70184	4.56e-07	7.14e-06	-2.91754	0.000682101	0.00443598	1.04881	0.000103343	0.000661046
Glyma.13G169900	HOX16	7.82	7.28	8.08	18.01	15.43	16.75	6.57	6.31	8.28	31.82	28.38	31.12	11.76	13.42	11.42	24.01	23.6	26.02	7.7267	7.0533	12.2	16.73	30.44	24.5433	1.11452	3.71e-19	2.31e-17	2.10959	1.59e-66	3.63e-64	1.00845	1.4e-29	6.19e-28
Glyma.13G222100	CODM	0.2	0.27	0.38	1.2	0.58	1.06	0.83	1	0.46	0.18	0.4	0.13	0.56	0.05	0.23	0.56	1.61	0.9	0.2833	0.7633	0.28	0.9467	0.2367	1.0233	1.74036	0.00289632	0.0176718	-1.68946	0.00966671	0.0440286	1.86978	0.00233553	0.0108467
Glyma.13G237000	DRM1	26.18	9.6	18.34	78.49	60.76	62.27	101.41	158.38	136.27	33.23	27.53	30.21	151.81	121.44	140.58	42.06	31.23	36.56	18.04	132.02	137.943	67.1733	30.3233	36.6167	1.89669	5.94e-06	7.49e-05	-2.12226	1.44e-62	2.99e-60	-1.9135	2.18e-31	1.03e-29
Glyma.13G240500	ALN	0.34	0.29	0.43	1.44	1.04	1.17	0.05	0.16	0.1	0.62	0.91	0.76	0.17	2.42	1.04	0.08	0.08	0.24	0.3533	0.1033	1.21	1.2167	0.7633	0.1333	1.78383	8.06e-06	9.83e-05	2.88501	9.11e-07	1.09e-05	-3.1819	0.00532276	0.0222926
Glyma.13G248000	--	0.87	0.37	0.89	1.85	1.58	1.71	4.14	2.95	3.36	1.58	1.53	1.34	3.52	4.72	4.22	1.83	1.58	2.02	0.71	3.4833	4.1533	1.7133	1.4833	1.81	1.27091	0.00133372	0.00912706	-1.23163	1.08e-05	0.000105976	-1.19828	2.35e-05	0.000170116
Glyma.13G321100	TPS7	50.53	57.79	53.96	18.87	26.8	22.35	17.58	18.65	18.07	1.76	4.1	3.29	8.5	8.39	9.94	2.46	3.42	3.34	54.0933	18.1	8.9433	22.6733	3.05	3.0733	-1.25445	1.62e-35	2.72e-33	-2.56911	3.71e-16	1.22e-14	-1.54101	3.14e-17	7.6e-16
Glyma.13G333200	MYB48	9.52	6.54	7.97	2.16	1.71	1.63	88.5	93.4	90.81	3.91	3.09	3.5	20.19	23.44	21.52	3.4	2.93	3.85	8.01	90.9033	21.7167	1.8333	3.5	3.3933	-2.12733	5.13e-22	3.81e-20	-4.69891	6.93e-307	1.86e-303	-2.67803	4.52e-60	4.45e-58
Glyma.13G358600	--	2.18	1.27	1.61	0.77	0.76	0.92	3.01	2.3	3.14	1.28	0.77	1.16	0.77	0.73	1.3	1.45	2.02	2.61	1.6867	2.8167	0.9333	0.8167	1.07	2.0267	-1.04636	0.00210573	0.0134663	-1.39638	1.49e-05	0.000142126	1.11864	0.000700664	0.00373361
Glyma.14G011800	At1g12760	3.29	1.79	2.26	5.66	5.28	5.86	5.05	7.71	5.67	2.58	2.22	2.3	6.23	4.8	5.74	10.75	11.67	11.39	2.4467	6.1433	5.59	5.6	2.3667	11.27	1.19461	1.02e-08	2.1e-07	-1.37617	1.2e-11	2.67e-10	1.01157	5.75e-18	1.46e-16
Glyma.14G056800	PFE2	2.15	3.47	3	19.27	20.79	19.21	4.99	4.53	4.67	11.63	11.93	11.67	7.24	5.57	6.38	11.98	14.71	14.71	2.8733	4.73	6.3967	19.7567	11.7433	13.8	2.78154	6.2e-56	2.17e-53	1.31193	5.36e-15	1.62e-13	1.10928	3.33e-14	6.66e-13
Glyma.14G098100	FAP2	1.62	2.83	2.14	0.68	0.78	0.93	0.26	0.23	0.22	0.51	1.08	0.69	4.39	3.93	3.58	8.34	8.61	8.01	2.1967	0.2367	3.9667	0.7967	0.76	8.32	-1.46327	7.52e-09	1.59e-07	1.68314	0.000261603	0.00189146	1.06866	2.86e-21	8.71e-20
Glyma.14G162100	PP2C51	21.82	25.99	24.88	84.59	84.45	90.09	5.03	4.6	5.41	36.7	35.99	37.7	89.35	76.85	81.58	213.28	204.27	201.76	24.23	5.0133	82.5933	86.3767	36.7967	206.437	1.83385	1.8e-105	2.58e-102	2.87573	3.04e-127	1.59e-124	1.3216	2.65e-153	9.27e-151
Glyma.14G195000	AS1	113.8	162.57	139.06	46.31	44.2	43.55	147.33	122.86	133.5	664.93	752.89	710.01	616.07	607.06	621.55	1991.3	1979.61	1981.48	138.477	134.563	614.893	44.6867	709.277	1984.13	-1.63173	1.01e-28	1.22e-26	2.39806	2.67e-191	3.18e-188	1.6901	0	0
Glyma.14G195300	MAPKKK17	0.79	0.75	0.27	1.85	1.08	1.66	0.27	1.09	0.81	0.2	0.23	0.2	0.39	1.22	0.6	8.5	7.91	7.24	0.6033	0.7233	0.7367	1.53	0.21	7.8833	1.3425	0.00264301	0.0163957	-1.78427	0.00938722	0.0429743	3.41972	4.22e-37	2.41e-35
Glyma.14G214500	MYB20	6.43	4.19	4.55	1.7	1.72	1.57	4.54	6.45	4.61	1.8	2.69	1.98	7.08	7.46	6.99	1.91	2.5	1.46	5.0567	5.2	7.1767	1.6633	2.1567	1.9567	-1.60411	5.11e-11	1.45e-09	-1.26971	4.5e-07	5.64e-06	-1.87492	2.48e-14	5.01e-13
Glyma.15G071200	AS1	0.25	0.25	0.36	0.48	0.88	0.88	0.28	1.79	0.85	0	0	0.06	7.69	3.38	5.59	1.64	2.19	1.52	0.2867	0.9733	5.5533	0.7467	0.02	1.7833	1.38109	0.00639334	0.0342863	-5.60486	1.63e-06	1.86e-05	-1.63878	6.93e-09	8.4e-08
Glyma.15G076500	DRM1	15.12	5.31	8.47	70.33	55.07	62.02	40.29	63.21	54.23	21.24	17.63	20.92	99.41	83.5	95.04	43.81	39.33	43.71	9.6333	52.5767	92.65	62.4733	19.93	42.2833	2.69713	1.56e-09	3.63e-08	-1.39948	6.62e-26	3.96e-24	-1.1317	2.33e-39	1.44e-37
Glyma.15G083000	--	1.12	0.79	1.15	3.72	3.36	4.5	1.64	2.45	2.57	1.33	0.64	1.02	0.91	0.4	0.55	0.08	0.09	0.08	1.02	2.22	0.62	3.86	0.9967	0.0833	1.92003	2.45e-11	7.21e-10	-1.15538	0.00166851	0.00976041	-2.8953	0.00115775	0.00584151
Glyma.15G133000	--	0.36	0.3	0.85	1.58	1.57	2.25	0	0	0	2.13	1.78	2.18	0	0	0	0.86	1.16	0.86	0.5033	0	0	1.8	2.03	0.96	1.83841	0.00352893	0.020895	10.9873	9.89e-08	1.36e-06	9.90689	4.78e-05	0.000325996
Glyma.15G134900	At1g64890	1.95	2.66	2.26	4.79	5.81	6.78	0.47	0.52	0.65	3	2.99	2.73	0.56	0.6	0.62	6.06	6.33	5.22	2.29	0.5467	0.5933	5.7933	2.9067	5.87	1.33905	7.16e-11	2e-09	2.41063	1.22e-15	3.87e-14	3.30645	5.1e-39	3.08e-37
Glyma.15G156200	SCPL49	13.43	11.94	13.62	5.03	5.97	4.61	23.89	26.37	24.36	7.66	8.66	8.38	18.19	16.9	17.82	9.24	8.82	8.25	12.9967	24.8733	17.6367	5.2033	8.2333	8.77	-1.32063	6.53e-24	5.63e-22	-1.59505	7.91e-47	1.07e-44	-1.00793	2.15e-15	4.68e-14
Glyma.15G173000	GPC1	0.35	0.7	0.54	2.96	2.98	2.55	0.03	0.03	0	0.29	0.39	0.27	0.33	0.8	0.29	2.73	2.28	1.95	0.53	0.02	0.4733	2.83	0.3167	2.32	2.41674	3.04e-14	1.21e-12	3.98489	0.0014386	0.0085874	2.2932	6.25e-11	9.52e-10
Glyma.15G180000	ERF017	0.37	0.4	0.59	2.6	0.8	1.14	6.85	34.88	20.86	0.5	0.96	0.72	0.9	2.55	1.35	5.95	6.01	6.5	0.4533	20.8633	1.6	1.5133	0.7267	6.1533	1.73909	0.001232	0.00852021	-4.84353	4.31e-12	1e-10	1.9433	2.16e-13	4.05e-12
Glyma.15G250100	NCED1	6.76	8.19	7.27	29.51	29.03	29.99	1.24	3.2	2.16	13.92	14.67	14.38	3.67	4.3	4.15	21.47	24.1	23.39	7.4067	2.2	4.04	29.51	14.3233	22.9867	1.99431	3.95e-100	4.36e-97	2.70279	1.52e-15	4.76e-14	2.50837	3.25e-142	1.03e-139
Glyma.15G251500	PARC	106.44	100.19	109.89	52.7	47.58	49.79	125.78	155.14	137.68	439.56	429.42	444.37	467.92	413.66	460.05	1576.5	1584.15	1575.85	105.507	139.533	447.21	50.0233	437.783	1578.83	-1.07666	2.03e-54	6.88e-52	1.64961	8.07e-120	3.81e-117	1.81983	0	0
Glyma.16G008500	At1g72540	4.07	3.19	3.89	1.94	1.92	1.45	8.36	11.5	9.54	2.57	2.98	2.87	4.88	5.28	4.66	2.17	2.04	2.47	3.7167	9.8	4.94	1.77	2.8067	2.2267	-1.07026	4.14e-07	6.54e-06	-1.80392	9.36e-26	5.57e-24	-1.14963	3.94e-07	3.79e-06
Glyma.16G021000	ATHB-12	8.62	6.92	8.64	24.24	19.83	23.04	3.28	3.2	5.32	8.75	8.73	8.01	5.72	6.85	7.15	22.35	20.14	21.41	8.06	3.9333	6.5733	22.37	8.4967	21.3	1.47271	3.18e-22	2.41e-20	1.11114	9.16e-07	1.09e-05	1.69616	2.01e-33	1.02e-31
Glyma.16G085600	--	0.2	0.13	0.09	2.77	1.99	3.05	0.52	2.09	1.34	2.92	4.87	3.53	0	0.14	0.13	21.77	22.23	19.74	0.14	1.3167	0.09	2.6033	3.7733	21.2467	4.21686	6.45e-14	2.49e-12	1.51895	6.57e-06	6.71e-05	7.8831	1.92e-40	1.22e-38
Glyma.16G169300	RLP6	5.94	6.92	6.44	1.38	1.01	1.04	6.11	7.34	7.55	1.9	3.09	2.59	4.2	4.38	4.49	0.96	1.48	0.94	6.4333	7	4.3567	1.1433	2.5267	1.1267	-2.49232	1.04e-53	3.4e-51	-1.47012	7e-20	3.01e-18	-1.95116	1.84e-21	5.68e-20
Glyma.16G169400	RLP24	2.45	2.56	2.61	0.49	0.65	0.62	2.53	3.76	3.34	1.35	1.33	1.67	3.39	4.23	3.83	1.29	0.91	1.33	2.54	3.21	3.8167	0.5867	1.45	1.1767	-2.11422	1.12e-21	8.13e-20	-1.14652	1.79e-08	2.72e-07	-1.69761	8.39e-16	1.87e-14
Glyma.16G183600	--	1.91	1.1	1.48	0.42	0.74	0.41	3.83	4.88	4.08	1.98	1.64	1.47	1.63	1.67	1.33	0.25	0.39	0.37	1.4967	4.2633	1.5433	0.5233	1.6967	0.3367	-1.51595	1.52e-05	0.000174638	-1.32928	1.73e-09	2.97e-08	-2.19666	2.28e-07	2.26e-06
Glyma.16G184200	EIX2	0.54	0.54	0.5	0.18	0.06	0.09	1.11	1.99	1.42	0.42	0.29	0.47	0.37	0.54	0.37	0.11	0.1	0.04	0.5267	1.5067	0.4267	0.11	0.3933	0.0833	-2.25939	2.53e-06	3.45e-05	-1.93754	9.7e-10	1.71e-08	-2.35614	0.000185617	0.00112495
Glyma.16G184700	EIX2	1.69	1.46	1.66	1.03	0.49	0.74	3.63	4.72	3.54	1.52	1.04	1.74	1.86	1.26	1.42	0.49	0.76	0.7	1.6033	3.9633	1.5133	0.7533	1.4333	0.65	-1.08971	7.98e-05	0.000768908	-1.46734	7.51e-11	1.52e-09	-1.21922	0.00058808	0.00319544
Glyma.16G185100	EIX2	47.49	37.69	45.17	14.41	12.77	12.22	89.69	85.07	88.62	44.25	40.72	44	13.22	16.89	16.12	3.76	3.65	4.11	43.45	87.7933	15.41	13.1333	42.99	3.84	-1.72612	1.4e-81	9.91e-79	-1.03011	3.53e-39	3.72e-37	-2.00469	2.04e-49	1.61e-47
Glyma.16G185800	EIX2	1.32	1.17	1.13	0.46	0.3	0.35	2.51	3.58	3.09	0.91	1.24	1.22	0.7	0.82	0.91	0.13	0.09	0.2	1.2067	3.06	0.81	0.37	1.1233	0.14	-1.70543	5.14e-08	9.5e-07	-1.44575	5.21e-11	1.08e-09	-2.5325	6.23e-07	5.8e-06
Glyma.16G186100	EIX2	0.18	0.44	0.3	0.11	0.12	0.03	0.94	1.26	0.97	0.24	0.23	0.31	5	4.62	5.05	2.16	1.78	2.19	0.3067	1.0567	4.89	0.0867	0.26	2.0433	-1.82312	0.00783601	0.0404414	-2.02294	1.08e-07	1.49e-06	-1.25891	4.51e-12	7.64e-11
Glyma.16G186200	EIX1	0.15	0.44	0.33	0.06	0.03	0.11	1.08	0.75	0.84	0.31	0.22	0.29	0.35	0.46	0.68	0.12	0.08	0.11	0.3067	0.89	0.4967	0.0667	0.2733	0.1033	-2.20163	0.00411034	0.0237084	-1.70314	7.64e-05	0.000625982	-2.26497	0.000532502	0.00292996
Glyma.16G190200	EIX2	1.23	0.78	0.83	0.32	0.26	0.24	1.99	2.32	2.79	1.12	0.98	1.04	3.31	3.57	3.72	1.4	1.29	0.82	0.9467	2.3667	3.5333	0.2733	1.0467	1.17	-1.7922	6.84e-06	8.5e-05	-1.17705	3.46e-06	3.74e-05	-1.59452	7.63e-11	1.15e-09
Glyma.16G191000	EIX1	7	5.66	6.31	1.28	1.95	1.4	12.77	14.46	14.77	6.36	5.88	5.52	3.64	4.16	3.4	0.92	0.67	0.72	6.3233	14	3.7333	1.5433	5.92	0.77	-2.03464	8.12e-33	1.18e-30	-1.24176	1.92e-26	1.2e-24	-2.27753	1.01e-20	2.96e-19
Glyma.16G192600	EIX2	0.69	1.1	1.06	0.27	0.16	0.25	1.48	2.43	2.68	0.6	0.4	0.62	4.15	4.22	3.75	1.75	1.41	1.64	0.95	2.1967	4.04	0.2267	0.54	1.6	-2.06736	1.55e-06	2.2e-05	-2.02428	4.04e-10	7.47e-09	-1.33628	1.45e-09	1.9e-08
Glyma.16G193000	EIX1	0.45	0.61	0.6	0.02	0.18	0.22	1.02	1.58	1.18	0.25	0.52	0.36	0.53	0.28	0.2	0.07	0	0	0.5533	1.26	0.3367	0.14	0.3767	0.0233	-1.98272	0.00026583	0.00224389	-1.74206	2.95e-06	3.23e-05	-3.85086	0.000574683	0.00313261
Glyma.16G222200	At2g38640	3.99	3.85	3.88	1.73	1.75	2.16	8.91	9.13	9.88	3.75	2.96	2.66	20	23.09	21.1	6.98	5.68	7.95	3.9067	9.3067	21.3967	1.88	3.1233	6.87	-1.05521	0.000200617	0.00175359	-1.57518	2.16e-11	4.65e-10	-1.639	9.42e-21	2.78e-19
Glyma.17G008500	--	6.57	4.25	5.41	0.75	0.76	0.63	3.1	2.6	3.24	0.73	0.61	0.91	0.43	14.68	7.44	0.13	0.22	0.26	5.41	2.98	7.5167	0.7133	0.75	0.2033	-2.92298	1.76e-16	8.59e-15	-1.99035	2.12e-06	2.37e-05	-5.20817	7.26e-05	0.000478255
Glyma.17G030100	N13	17.87	13.94	16.72	6.37	7.21	6.25	27.31	43.18	35.15	10.55	13.88	15.3	13.84	14.27	13.78	5.64	5.24	3.81	16.1767	35.2133	13.9633	6.61	13.2433	4.8967	-1.29119	5.6e-16	2.61e-14	-1.41086	4.67e-18	1.76e-16	-1.51177	4.37e-13	8.05e-12
Glyma.17G030300	PR-10	4.71	3.96	4.4	0.97	1.06	1.68	13.26	20.11	17.56	1.91	2.81	2.73	4.52	3	4.6	2.12	2.06	1.66	4.3567	16.9767	4.04	1.2367	2.4833	1.9467	-1.81677	8.74e-09	1.82e-07	-2.7732	1.04e-35	9.5e-34	-1.05335	0.00457181	0.0195147
Glyma.17G043000	NPF4.5	3.16	3.68	3.34	0.9	0.86	1.14	17.61	16.81	17.07	4.99	6.2	4.84	58.91	61.59	60.84	23.93	23.97	24.52	3.3933	17.1633	60.4467	0.9667	5.3433	24.14	-1.81161	3.15e-16	1.5e-14	-1.68352	6.22e-43	7.41e-41	-1.32424	2.18e-86	3.48e-84
Glyma.17G067200	GLR2.8	7.11	5.12	6.57	1.36	1.14	1.44	6.55	9.61	7.76	2.49	3.05	2.5	11.54	13.1	11.9	4.32	4.29	4.33	6.2667	7.9733	12.18	1.3133	2.68	4.3133	-2.25447	2.21e-25	2.12e-23	-1.57295	5.31e-16	1.73e-14	-1.49764	1.42e-21	4.41e-20
Glyma.17G073200	SCPL24	5.81	3.23	5.58	2.09	1.79	1.91	25.37	28.02	25.35	8.84	10.88	10.55	2.43	2.69	3.02	0.64	0.48	0.31	4.8733	26.2467	2.7133	1.93	10.09	0.4767	-1.33631	4.34e-10	1.08e-08	-1.37921	3.35e-38	3.36e-36	-2.50901	5.28e-13	9.66e-12
Glyma.17G076100	ChiC	4.04	5.43	3.57	16.95	15.01	16.01	1.41	1.73	1.61	4.67	3.96	4.72	1.82	0.96	1.65	4.08	2.31	3.12	4.3467	1.5833	1.4767	15.99	4.45	3.17	1.87919	3.5e-33	5.17e-31	1.49084	5.78e-10	1.05e-08	1.10214	6.32e-05	0.000420256
Glyma.17G116500	--	7.14	7.56	7.88	15.57	14.64	15.67	6.45	4.46	5.59	14.04	15.51	16.06	7.12	9.63	7.38	1.1	1.61	1.59	7.5267	5.5	8.0433	15.2933	15.2033	1.4333	1.02282	8.83e-21	6.08e-19	1.46688	7.06e-27	4.51e-25	-2.48842	3.74e-34	1.94e-32
Glyma.17G116800	--	2.51	1.69	1.83	14.53	15.94	14.65	3.52	5.37	4.59	16.79	27.35	22.4	9.28	10.37	8.91	5.13	4.35	3.82	2.01	4.4933	9.52	15.04	22.18	4.4333	2.90354	2.25e-41	4.95e-39	2.3034	4.64e-33	3.87e-31	-1.10257	2.27e-06	1.95e-05
Glyma.17G118200	--	1.87	1.53	2.33	6.17	4.23	4.12	6.18	23.98	14.14	2.87	3.5	2.84	4.8	5.95	4.47	13.79	12.99	15.26	1.91	14.7667	5.0733	4.84	3.07	14.0133	1.34143	4.56e-08	8.51e-07	-2.26603	2.55e-05	0.000231969	1.46579	2.34e-28	9.87e-27
Glyma.17G127900	--	0.87	1.5	1.25	20.66	16.46	19.09	0.11	0.15	0.28	1.31	1.67	1.57	0.72	0.82	0.74	9.45	8.56	9.69	1.2067	0.18	0.76	18.7367	1.5167	9.2333	3.95677	8.65e-110	1.49e-106	3.07484	3.41e-11	7.22e-10	3.60278	8.17e-66	9.02e-64
Glyma.17G142900	VAB	0.83	0.72	1	0.45	0.22	0.4	1.54	1.88	1.95	0.3	0.48	0.6	0.28	0.61	0.27	0.12	0.05	0.05	0.85	1.79	0.3867	0.3567	0.46	0.0733	-1.25289	0.00104547	0.00741246	-1.96025	2.79e-09	4.69e-08	-2.39855	0.00298337	0.0134363
Glyma.17G165200	NRAMP3	6.53	3.88	4.68	1.05	0.91	1.3	3.43	4.85	3.98	0.77	0.86	0.81	5.25	6.95	6.44	2.85	3.03	2.81	5.03	4.0867	6.2133	1.0867	0.8133	2.8967	-2.21065	4.34e-23	3.54e-21	-2.32901	7.68e-22	3.72e-20	-1.10097	4.71e-09	5.84e-08
Glyma.17G242900	PAH2	2.05	2.08	1.81	5	5.09	4.67	0.69	1.21	1.01	18.61	19.72	16.77	6.87	6.35	6.35	53.52	55.71	54.61	1.98	0.97	6.5233	4.92	18.3667	54.6133	1.31316	2.77e-13	9.93e-12	4.24296	1.99e-142	1.3e-139	3.06557	0	0
Glyma.17G251800	--	4.11	3.2	3.19	8.93	8.53	7.19	12.13	10.78	13.55	4.39	5.67	6.71	16.86	16.32	16.27	5.34	5.52	6.07	3.5	12.1533	16.4833	8.2167	5.59	5.6433	1.2312	5.44e-13	1.9e-11	-1.12043	5.76e-12	1.33e-10	-1.54639	9.64e-32	4.65e-30
Glyma.18G050200	--	1.67	1.56	1.52	0.75	0.67	0.86	0.24	0.1	0.19	3.65	3.11	4.01	0.77	0.67	0.64	3.33	4.19	3.75	1.5833	0.1767	0.6933	0.76	3.59	3.7567	-1.05889	0.000595552	0.0045491	4.34488	9.17e-24	4.92e-22	2.43783	7.71e-18	1.95e-16
Glyma.18G052600	MALD3	29.86	17.81	23.83	6.19	7.01	7.01	111.58	113.11	98.57	8.3	13.39	13.67	29.84	37.9	35.23	8.57	8.13	9.84	23.8333	107.753	34.3233	6.7367	11.7867	8.8467	-1.82287	4.23e-24	3.7e-22	-3.1925	4.95e-123	2.42e-120	-1.95598	5.22e-35	2.79e-33
Glyma.18G072800	At1g55760	9.16	6.5	8.2	17.46	18.2	17.13	1.36	1.47	1.3	66.89	64.23	66.47	13.79	11.33	14.05	38.27	37.08	38.06	7.9533	1.3767	13.0567	17.5967	65.8633	37.8033	1.14567	3.36e-27	3.62e-25	5.58022	0	0	1.53373	1.37e-116	3.17e-114
Glyma.18G172800	SDI1	0	0.05	0.15	1.03	0.55	0.7	0.12	0	0	1.16	0.96	0.86	0.95	0.56	0.72	0.13	0	0	0.0667	0.04	0.7433	0.76	0.9933	0.0433	3.51096	8.55e-05	0.000818125	4.63421	7.25e-06	7.35e-05	-4.10046	0.0013314	0.00662616
Glyma.18G205800	PFE	10.38	14.95	12	61.99	76.53	71.58	11.43	15.6	13	127.3	133.02	124.21	35.05	20.01	24.81	128.15	128.29	130.52	12.4433	13.3433	26.6233	70.0333	128.177	128.987	2.49267	2.61e-92	2.45e-89	3.26394	2.19e-252	4.7e-249	2.27646	3.35e-24	1.18e-22
Glyma.18G211000	PNC1	6.71	4.87	6.52	2.33	2.99	2.62	7.1	9.36	8.67	3.41	3.81	3.98	2.57	2.58	2.22	1.38	0.71	1.06	6.0333	8.3767	2.4567	2.6467	3.7333	1.05	-1.18878	1.52e-08	3.06e-07	-1.16591	2.32e-09	3.92e-08	-1.22631	0.00208998	0.00983887
Glyma.18G273100	ANX2	0.58	0.65	0.83	2.63	2.92	2.43	0.32	0.55	0.56	1.06	1.07	1.07	2.26	1.73	1.9	5.1	3.83	4.94	0.6867	0.4767	1.9633	2.66	1.0667	4.6233	1.95374	2.08e-08	4.1e-07	1.16206	0.00842828	0.0392835	1.23563	1.17e-08	1.38e-07
Glyma.19G008500	EO	5.68	4.26	4.65	12.27	9.15	10.91	0.84	1.44	0.67	15.3	14.98	16.87	22.09	20.27	19.43	5.14	4.54	4.75	4.8633	0.9833	20.5967	10.7767	15.7167	4.81	1.14789	2.3e-10	6e-09	3.99847	2.1e-66	4.78e-64	-2.0983	1.81e-43	1.22e-41
Glyma.19G008700	EO	3.19	3.57	2.43	8.96	6.12	7.11	3.02	5.49	3.54	16.83	18.25	17.31	129.59	120.04	133.52	28.4	24.57	23.89	3.0633	4.0167	127.717	7.3967	17.4633	25.62	1.27177	1.86e-09	4.29e-08	2.12026	5.07e-38	5.02e-36	-2.3176	7.86e-184	3.65e-181
Glyma.19G011700	DOX1	1.09	0.52	1.17	0.05	0.51	0.35	4	4.17	3.59	0.41	0.76	0.63	3.17	1.65	2.12	0.53	0.66	0.57	0.9267	3.92	2.3133	0.3033	0.6	0.5867	-1.61115	0.00103989	0.00737778	-2.70782	6.55e-25	3.73e-23	-1.97936	1.32e-08	1.54e-07
Glyma.19G015000	CYP82A4	11.5	6.36	9.18	4.73	4.09	4.17	52.47	69.37	62.74	3.37	4.49	3.81	72.24	82.9	71.34	30.07	28.43	29.38	9.0133	61.5267	75.4933	4.33	3.89	29.2933	-1.05769	2.04e-10	5.36e-09	-3.98337	1.18e-242	2.2e-239	-1.36578	1.12e-73	1.39e-71
Glyma.19G022000	--	1.3	1.13	1.07	0.54	0.51	0.39	2.31	2.14	2.02	0.61	0.76	0.92	4.07	4	3.53	1.68	1.64	2.38	1.1667	2.1567	3.8667	0.48	0.7633	1.9	-1.28129	1.36e-05	0.000157682	-1.49842	4.87e-09	7.91e-08	-1.02509	2.23e-06	1.92e-05
Glyma.19G023200	CDF2	0.95	1.2	1.12	4.28	4.75	4.18	0.14	0.09	0.34	0.76	0.31	0.7	1.1	0.62	1.23	6.57	6.21	6.62	1.09	0.19	0.9833	4.4033	0.59	6.4667	2.01427	5.6e-18	3.13e-16	1.63472	0.00840585	0.039196	2.71727	6.46e-36	3.53e-34
Glyma.19G036700	GLIP7	0	0	0	0.49	0.21	0.42	0	0	0	0.05	0.3	0.3	0	0	0	0.3	0.06	0.22	0	0	0	0.3733	0.2167	0.1933	8.54432	0.000160523	0.00144026	7.75933	0.00498774	0.0252502	7.59495	0.00826286	0.0324799
Glyma.19G055100	At5g40670	4.92	4.05	4.81	10.35	9.56	9.21	3.83	6.18	4.71	14.27	15.02	12.57	67.58	64.68	60.86	8.84	5.13	6.85	4.5933	4.9067	64.3733	9.7067	13.9533	6.94	1.07943	2.1e-09	4.82e-08	1.50779	1.64e-18	6.37e-17	-3.21346	1.66e-51	1.38e-49
Glyma.19G069200	PP2C51	3.82	6.29	5.35	23.17	21.28	23.54	0.52	0.29	0.38	11.56	11.04	10.91	8.83	9.33	9.3	32.64	29.69	30.28	5.1533	0.3967	9.1533	22.6633	11.17	30.87	2.13678	5.86e-50	1.73e-47	4.81556	2e-62	4.13e-60	1.75384	1.31e-80	1.88e-78
Glyma.19G098500	GDPD1	63.46	48.91	61	123.67	115.99	120.55	5.18	5.88	5.53	369.83	355.47	372.39	9.21	3.72	5.8	517.22	540.17	515.38	57.79	5.53	6.2433	120.07	365.897	524.257	1.05498	8.93e-34	1.36e-31	6.04801	0	0	6.39181	2.85e-69	3.36e-67
Glyma.19G144600	CYP93A3	0.16	0.04	0.19	0.53	0.46	0.84	0.16	0.38	0.23	1	1	1.36	0.04	0.11	0.22	1.4	0.68	0.89	0.13	0.2567	0.1233	0.61	1.12	0.99	2.2303	0.00140933	0.00956238	2.12553	1.84e-05	0.000171839	3.00487	1.93e-06	1.68e-05
Glyma.19G197900	--	1.42	1.83	2.01	4.9	5.33	6.37	0.07	0.43	0.39	3.31	3.21	3.41	0	0.22	0	2.91	2.55	3.65	1.7533	0.2967	0.0733	5.5333	3.31	3.0367	1.65805	1.33e-09	3.12e-08	3.47992	9.16e-12	2.06e-10	5.37188	3.05e-10	4.32e-09
Glyma.19G218300	LACS1	0.14	0.1	0.05	0.63	0.26	0.45	0.07	0.1	0.09	0.31	0.4	0.79	0.78	0.51	0.45	2.46	2.84	2.59	0.0967	0.0867	0.58	0.4467	0.5	2.63	2.20811	0.00176894	0.0116339	2.52838	0.000219009	0.00161392	2.18094	9.53e-16	2.11e-14
Glyma.19G228000	BHLH149	1.1	0.77	1.18	3.72	5.23	4.2	0.31	0.32	0.41	1.55	1.48	1.47	0.35	0	0.34	1.48	0.7	1.79	1.0167	0.3467	0.23	4.3833	1.5	1.3233	2.10818	1.97e-06	2.75e-05	2.11334	0.00351403	0.0186813	2.52447	0.00337162	0.0149579
Glyma.19G230500	TPR3	1.02	1.04	1.14	3.15	2.51	2.35	1.48	2.33	1.47	0.78	0.86	0.57	1.22	1.12	1.22	0.48	0.51	0.65	1.0667	1.76	1.1867	2.67	0.7367	0.5467	1.32373	1.16e-11	3.53e-10	-1.25649	1.71e-06	1.94e-05	-1.11818	0.000424226	0.00238142
Glyma.20G007000	CYP71D11	5.18	4.54	4.88	1.84	1.85	1.48	20.65	22.18	19.82	5.21	4.75	6.44	13.02	12.86	13.04	1.62	2.28	2.01	4.8667	20.8833	12.9733	1.7233	5.4667	1.97	-1.49773	8.34e-14	3.17e-12	-1.93362	1.46e-47	2.04e-45	-2.71928	1.04e-53	9e-52
Glyma.20G045800	SHT	4.24	7.7	5.87	2.76	2.76	2.1	0.27	0.51	0.34	1.14	1.66	1.84	2.96	3.55	3.85	10.27	12.57	12.27	5.9367	0.3733	3.4533	2.54	1.5467	11.7033	-1.22482	1.21e-08	2.47e-07	2.05063	2.08e-06	2.32e-05	1.76086	1.49e-31	7.13e-30
Glyma.20G137200	CRK29	0.79	0.62	0.9	0.36	0.16	0.06	2.34	3.39	3	0.63	0.81	0.75	4.03	4.2	3.98	1.62	1.16	1.13	0.77	2.91	4.07	0.1933	0.73	1.3033	-1.99377	0.000119261	0.00110671	-1.99505	1.13e-12	2.79e-11	-1.64282	1.71e-11	2.75e-10
Glyma.20G138800	CRK26	5.46	3.59	4.7	1.85	2.1	1.3	8.11	11.42	8.47	3.63	3.35	4.06	6.92	6.52	6.53	1.77	1.86	2.63	4.5833	9.3333	6.6567	1.75	3.68	2.0867	-1.38904	1.81e-11	5.42e-10	-1.34269	3.3e-16	1.09e-14	-1.6736	3.91e-17	9.4e-16
Glyma.20G148900	HMT3	1.8	0.98	1.26	3.59	2.87	3.76	6.73	9.37	8.45	2.21	2.72	2.93	52.17	44.8	48.01	12.54	9.77	12.43	1.3467	8.1833	48.3267	3.4067	2.62	11.58	1.33897	7.03e-07	1.06e-05	-1.64312	1.79e-17	6.46e-16	-2.06118	1.17e-82	1.76e-80
Glyma.20G153700	MADS17	4.86	5.48	5.78	17.5	17.67	19.26	1	0.42	1.36	6.66	7.61	6.29	32.74	29.8	28.19	66.39	67.63	70.98	5.3733	0.9267	30.2433	18.1433	6.8533	68.3333	1.75555	1.09e-30	1.44e-28	2.88668	2.37e-21	1.11e-19	1.17597	9.35e-60	9.16e-58
Glyma.20G158500	LTI65	4.1	9	6.27	81.29	73.53	80.24	0.12	0.15	0.09	1.79	2.35	1.43	1.15	0.79	1	7.75	6.33	7.35	6.4567	0.12	0.98	78.3533	1.8567	7.1433	3.60113	3.74e-28	4.29e-26	3.95161	3.52e-14	9.89e-13	2.86574	1.37e-41	8.93e-40
Glyma.20G237200	At1g56220	8.91	5.07	8.03	99.15	80.71	86.21	28.52	45.03	33.88	10.68	10.88	10.27	55.5	41.88	49.2	21.21	21.65	22.01	7.3367	35.81	48.86	88.69	10.61	21.6233	3.59557	9.13e-54	3e-51	-1.75494	1.99e-28	1.37e-26	-1.17606	1.6e-19	4.46e-18
Glyma.20G245100	G4DT	1.86	1.62	1.72	0.76	0.71	0.79	10.28	12.84	9.94	1.78	1.67	1.22	4.87	6.13	6.39	2.71	3.17	2.69	1.7333	11.02	5.7967	0.7533	1.5567	2.8567	-1.20219	0.000153943	0.00138696	-2.82359	1.67e-44	2.11e-42	-1.02089	7e-06	5.56e-05
Glyma.U002200	EIX2	7.53	6.47	8.32	1.87	1.52	1.71	14.6	16.61	14.99	7.27	7.24	7.93	4.89	5.41	5.32	0.96	0.94	0.83	7.44	15.4	5.2067	1.7	7.48	0.91	-2.12977	1.61e-18	9.47e-17	-1.04182	5.98e-11	1.22e-09	-2.51642	2.76e-13	5.13e-12
Glyma.U007900	EIX2	0.78	0.7	1.12	0.41	0.24	0.24	1.65	3.28	2.52	0.61	0.69	0.66	0.59	0.73	0.62	0.3	0.29	0.27	0.8667	2.4833	0.6467	0.2967	0.6533	0.2867	-1.54663	4.48e-06	5.82e-05	-1.92639	2.43e-14	6.96e-13	-1.17365	0.00391929	0.0170739
MSTRG.25709	--	0.58	0.55	0.75	3.05	2.11	1.83	0.2	0.49	0.44	1.43	1.66	1.53	2.08	4.18	3.33	0.66	0.41	0.3	0.6267	0.3767	3.1967	2.33	1.54	0.4567	1.89456	2.52e-06	3.44e-05	2.03157	2.97e-05	0.000266656	-2.80735	1.31e-09	1.74e-08
MSTRG.26696	--	2.87	2.09	2.27	4.8	5.72	4.89	1.8	1.54	0.84	8.78	7.02	6.59	0.81	0.29	0.37	5.56	5.59	5.02	2.41	1.3933	0.49	5.1367	7.4633	5.39	1.0918	3.49e-06	4.63e-05	2.42128	2.4e-21	1.12e-19	3.45943	1.8e-25	6.67e-24
